# Supplementary material for: Conformational equilibria in acrolein–CO2: the crucial contribution of n → π* interactions unveiled by rotational spectroscopy
Source: Royal Society of Chemistry journal article supplement (doi:10.1039/d4cp01650e), 2024-01-01
Supplement: d4cp01650e1.pdf [file d4cp01650e1.pdf]

## Conformational equilibria in acrolein-CO<sub>2</sub>: The crucial contribution of n → π\* interactions unveiled by rotational spectroscopy

Hao Wang,<sup>ab</sup> Junhua Chen,<sup>c</sup> Xiao Tian,<sup>a</sup> Chenxu Wang,<sup>a</sup> Junlin Lan,<sup>a</sup> Xingchen Liu,<sup>b</sup> Zhenhua Zhang,<sup>b</sup> Xiaodong Wen,<sup>b</sup> and Qian Gou<sup>\*a</sup>

<sup>a</sup> School of Chemistry and Chemical Engineering, Chongqing University, Daxuecheng South Rd. 55, 401331, Chongqing, China.

<sup>b</sup> State Key Laboratory of Coal Conversion, Institute of Coal Chemistry, Chinese Academy of Sciences, Taoyuan South Rd. 27, Taiyuan 030001, Shanxi, China.

<sup>c</sup> School of Pharmacy, Guizhou Medical University, Guiyang 550000, Guizhou, China.

\* E-mail: qian.gou@cqu.edu.cn

## Table of Contents

1. Fig. S1 Shapes and principal inertial axes of six isomers of ACR-CO<sub>2</sub>.
2. Fig. S2 Molecular structures and the NCI isosurfaces for the six plausible isomers of ACR-CO<sub>2</sub> predicted at the B2PLYP-D3(BJ)/6-311++G(d,p) level of theory.
3. Fig. S3 Potential energy surface of monomer and CO<sub>2</sub> complex conformation relaxation.
4. Table S1 Intensities (in arbitrary units) of the three isomers for several transitions.
5. Table S2 Partial  $r_0$  and B2PLYP-D3(BJ)/6-311++G(d,p) calculated geometries of ACR-CO<sub>2</sub> complexes (a: T1; b: T2; c: C1; d: C2; and e: CO<sub>2</sub>).
6. Table S3 NBO analysis for ACR-CO<sub>2</sub> (all values in kJ mol<sup>-1</sup>).
7. Table S4 NAO analysis for ACR-CO<sub>2</sub> about TB binding orbital.
8. Fig. S4 The  $n \rightarrow \pi^*$  interactions of four ACR-CO<sub>2</sub> clusters by NBO analyses.
9. Measured Transition Frequencies.

**Table S5**  $\mu_a/\mu_b$ -type transition frequencies ( $\nu$ /MHz) together with the corresponding observed – calculated differences ( $\Delta\nu$ /kHz) for **T1**.

**Table S6**  $\mu_a/\mu_b$ -type transition frequencies ( $\nu$ /MHz) together with the corresponding observed – calculated differences ( $\Delta\nu$ /kHz) for **T2**.

**Table S7**  $\mu_a/\mu_b$ -type transition frequencies ( $\nu$ /MHz) together with the corresponding observed – calculated differences ( $\Delta\nu$ /kHz) for **C1**.

# 1. Shapes and principal inertial axes of six isomers of ACR-CO<sub>2</sub>.

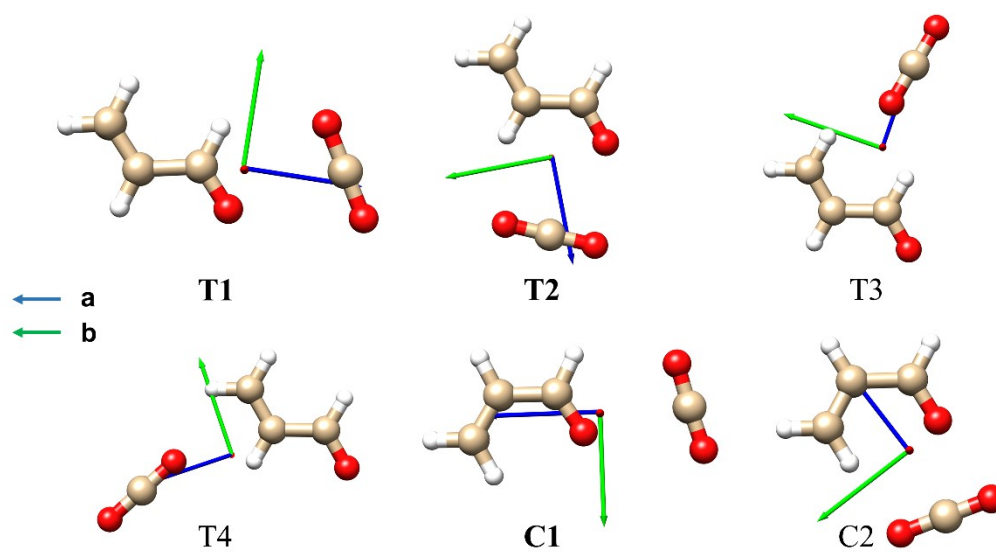

Fig. S1 Six isomers of ACR-CO<sub>2</sub> with the principal inertial axes at the B2PLYP-D3(BJ)/ 6-311++G(d,p) level of theory.

## 2. Molecular structures and the NCI isosurfaces for the six plausible isomers of ACR-CO<sub>2</sub>.

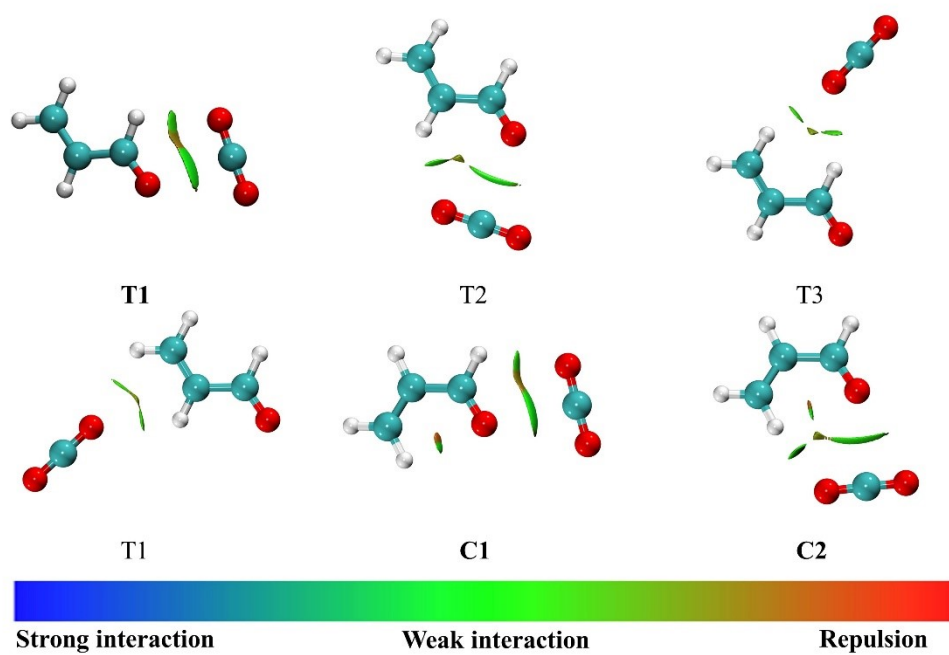

Fig. S2 Molecular structures and the NCI isosurfaces for the six plausible isomers of ACR-CO<sub>2</sub> predicted at the B2PLYP-D3(BJ)/6-311++G(d,p) level of theory. The NCI analyses based on the calculated structures, the gradient isosurfaces ( $s = 0.5$  a.u.) are coloured on a blue-green-red scale scaling to values of the electron density.

### 3. Potential energy surface

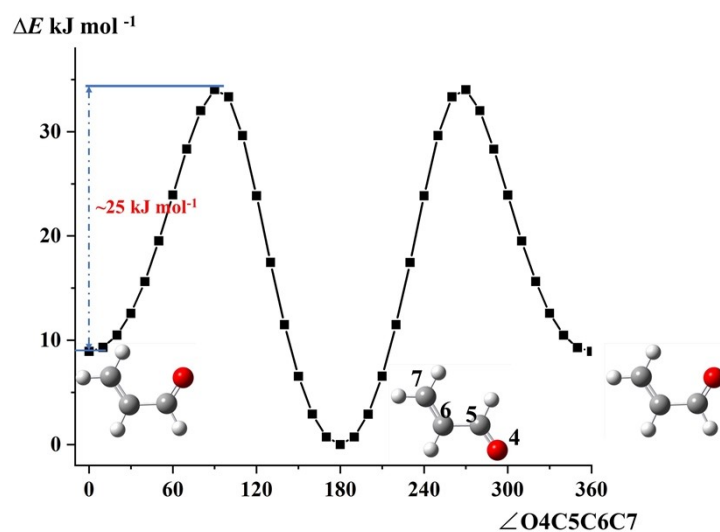

Fig. S3a The potential energy surface of cis/trans-ACR calculated at the B2PLYP-D3(BJ)/6-311++G(d,p) level of theory by changing the dihedral angle  $\angle\text{O4C5C6C7}$ . The  $E_{\text{min}}$  is -502992.8513  $\text{kJ mol}^{-1}$ , and the  $E_{\text{max}}$  is -502958.8253  $\text{kJ mol}^{-1}$ .

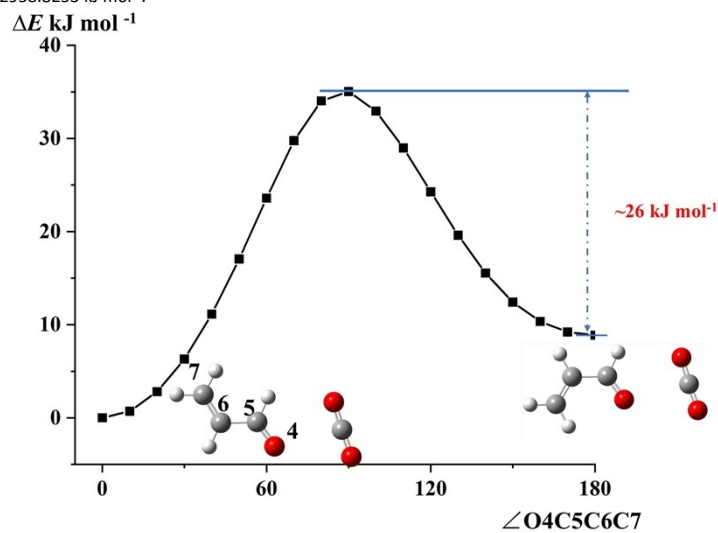

Fig. S3b The potential energy surface of T1 to C1 calculated at the B2PLYP-D3(BJ)/6-311++G(d,p) level of theory by changing the dihedral angle  $\angle\text{O4C5C6C7}$ . The  $E_{\text{min}}$  is -91970.43416  $\text{kJ mol}^{-1}$ , and the  $E_{\text{max}}$  is -998469.6821  $\text{kJ mol}^{-1}$ .

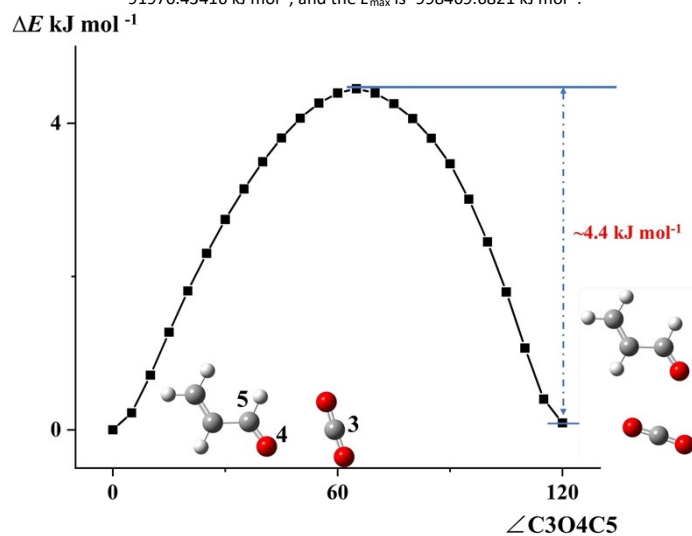

Fig. S3c The potential energy surface of T1 to T2 calculated at the B2PLYP-D3(BJ)/6-311++G(d,p) level of theory by changing the angle  $\angle\text{C3O4C5}$ . The  $E_{\text{min}}$  is -998469.6821  $\text{kJ mol}^{-1}$ , and the  $E_{\text{max}}$  is -998465.2327  $\text{kJ mol}^{-1}$ .

#### 4. Intensities (in arbitrary units) of the three isomers for several $\mu_a/\mu_b$ -types selected

**Table S1a** Intensities (in arbitrary units) of T1/T2 for several  $\mu_a/\mu_b$ -type selected transitions.

| Transitions                | Isomer | Frequencies | Intensities |
|----------------------------|--------|-------------|-------------|
| $3_{03} \leftarrow 2_{02}$ | T1     | 5413.9034   | 0.3807      |
|                            | T2     | 6302.9449   | 0.1804      |
| $4_{04} \leftarrow 3_{03}$ | T1     | 7213.6541   | 0.4920      |
|                            | T2     | 8376.8283   | 0.1388      |
| $6_{06} \leftarrow 5_{05}$ | T1     | 10799.6403  | 0.0516      |
|                            | T2     | 12453.2642  | 0.0274      |
| $8_{08} \leftarrow 7_{07}$ | T1     | 14361.1925  | 0.0148      |
|                            | T2     | 16418.0371  | 0.0026      |
| $1_{11} \leftarrow 0_{00}$ | T1     | 8944.8338   | 0.1251      |
|                            | T2     | 6675.4677   | 0.0489      |
| $2_{12} \leftarrow 1_{01}$ | T1     | 10651.2430  | 0.0887      |
|                            | T2     | 8593.6244   | 0.0495      |
| $3_{13} \leftarrow 2_{02}$ | T1     | 12308.2173  | 0.0858      |
|                            | T2     | 10418.6870  | 0.0265      |

**Table S1b** Intensities (in arbitrary units) of T1/C1 for several  $\mu_a/\mu_b$ -type selected transitions.

| Transitions                | Isomer | Frequencies | Intensities |
|----------------------------|--------|-------------|-------------|
| $3_{03} \leftarrow 2_{02}$ | T1     | 5413.9034   | 0.3807      |
|                            | C1     | 5595.7700   | 0.0096      |
| $4_{04} \leftarrow 3_{03}$ | T1     | 7213.6541   | 0.4920      |
|                            | C1     | 7455.3266   | 0.0149      |
| $8_{08} \leftarrow 7_{07}$ | T1     | 14361.1925  | 0.0148      |
|                            | C1     | 14833.6573  | 0.0009      |
| $1_{11} \leftarrow 0_{00}$ | T1     | 8944.8338   | 0.1251      |
|                            | C1     | 8898.7392   | 0.0034      |
| $2_{12} \leftarrow 1_{01}$ | T1     | 10651.2430  | 0.0887      |
|                            | C1     | 10658.6485  | 0.0037      |
| $3_{13} \leftarrow 2_{02}$ | T1     | 12308.2173  | 0.0858      |
|                            | C1     | 12365.5056  | 0.0041      |

## 5. Partial $r_0$ and B2PLYP-D3(BJ)/6-311++G(d,p) calculated geometries of ACR-CO<sub>2</sub> complexes

**Table S2a** Partial  $r_0$  and B2PLYP-D3(BJ)/6-311++G(d,p) calculated geometries for T1.

| Bond lengths (Å) |                             | Valence angles (°) |                | Dihedral angles (°) |        |
|------------------|-----------------------------|--------------------|----------------|---------------------|--------|
| O1O2             | 2.330                       |                    |                |                     |        |
| O1C3             | 1.167                       | O2O1C3             | 1.2            |                     |        |
| <b>C3O4</b>      | <b>2.832(1)<sup>a</sup></b> | <b>O1C3O4</b>      | <b>87.1(3)</b> | O1C3O4O2            | -180.0 |
| O4C5             | 1.217                       | C3O4C5             | 111.4          | C3O4C5O1            | -0.0   |
| C5C6             | 1.471                       | O4C5C6             | 124.0          | O4C5C6C3            | 180.0  |
| C6C7             | 1.339                       | C5C6C7             | 120.5          | C5C6C7O4            | -180.0 |
| C6H8             | 1.084                       | C5C6H8             | 117.0          | H8C6C5O4            | 0.0    |
| C7H9             | 1.082                       | C6C7H9             | 122.1          | H9C7C6C5            | 180.0  |
| C7H10            | 1.085                       | C6C7H10            | 120.8          | H10C7C6C5           | -0.0   |
| C5H11            | 1.107                       | C6C5H11            | 115.4          | H11C5C6C7           | -0.0   |

<sup>a</sup> Error in parentheses in units of the last digit. The parameters in bold have been adjusted to reproduce the experimental values of rotational constants. Their theoretical values are 2.821 Å and 87.3°, respectively.

**Table S2b** Partial  $r_0$  and B2PLYP-D3(BJ)/6-311++G(d,p) calculated geometries for T2.

| Bond lengths (Å) |                             | Valence angles (°) |                | Dihedral angles (°) |        |
|------------------|-----------------------------|--------------------|----------------|---------------------|--------|
| O1O2             | 2.329                       |                    |                |                     |        |
| O2C3             | 1.167                       | O2O1C3             | 1.0            |                     |        |
| <b>C3O4</b>      | <b>2.892(2)<sup>a</sup></b> | <b>O1C3O4</b>      | <b>89.7(6)</b> | O2O1C3O4            | 180.0  |
| O4C5             | 1.216                       | C3O4C5             | 128.9          | O1C3O4C5            | -0.0   |
| C5C6             | 1.472                       | O4C5C6             | 124.4          | C3O4C5C6            | 0.0    |
| C6C7             | 1.339                       | C5C6C7             | 120.3          | O4C5C6C7            | 180.0  |
| C6H8             | 1.083                       | C5C6H8             | 117.0          | O4C5C6O8            | -0.0   |
| C7H9             | 1.083                       | C6C7H9             | 122.0          | C5C6C7H9            | -180.0 |
| C7H10            | 1.086                       | C6C7H10            | 120.9          | C5 C6 C7H10         | -0.0   |
| C5H11            | 1.109                       | O4C5H11            | 120.6          | C3O4C5H11           | -180.0 |

<sup>a</sup> Error in parentheses in units of the last digit. The parameters in bold have been adjusted to reproduce the experimental values of rotational constants. Their theoretical values are 2.870 Å and 91.4°, respectively.

**Table S2c** Partial  $r_0$  and B2PLYP-D3(BJ)/6-311++G(d,p) calculated geometries for C1.

| Bond lengths (Å) |                             | Valence angles (°) |                | Dihedral angles (°) |       |
|------------------|-----------------------------|--------------------|----------------|---------------------|-------|
| O1O2             | 2.330                       |                    |                |                     |       |
| O1C3             | 1.167                       | O2O1C3             | 1.2            |                     |       |
| <b>C3O4</b>      | <b>2.832(1)<sup>a</sup></b> | <b>O1C3O4</b>      | <b>87.3(9)</b> | O4C3O1O2            | 180.0 |
| O4C5             | 1.217                       | C3O4C5             | 112.1          | C5O4C3O1            | -0.0  |
| C5C6             | 1.482                       | O4C5C6             | 124.2          | O4C5C6C3            | 180.0 |
| C6C7             | 1.338                       | C5C6C7             | 121.6          | C5C6C7O4            | 0.0   |

|       |       |         |       |           |        |
|-------|-------|---------|-------|-----------|--------|
| C6H8  | 1.084 | C5C6H8  | 120.1 | H8C7C6C5  | 0.0    |
| C7H9  | 1.082 | C6C7H9  | 122.1 | H9C7C6C5  | -180.0 |
| C6H10 | 1.085 | C6C7H10 | 116.9 | H10C6C5O4 | -180.0 |
| C5H11 | 1.107 | C6C5H11 | 115.9 | H11C5C6C7 | -180.0 |

<sup>a</sup> Error in parentheses in units of the last digit. The parameters in bold have been adjusted to reproduce the experimental values of rotational constants. Their theoretical values are 2.817 Å and 87.6°, respectively.

**Table S2d** The B2PLYP-D3(BJ)/6-311++G(d,p) calculated geometries for C2.

| Bond lengths (Å) |       | Valence angles (°) |       | Dihedral angles (°) |        |
|------------------|-------|--------------------|-------|---------------------|--------|
| O1O2             | 2.329 |                    |       |                     |        |
| O1C3             | 1.167 | O2O1C3             | 0.9   |                     |        |
| C3O4             | 2.883 | O1C3O4             | 91.4  | O4C3O1O2            | -180.0 |
| O4C5             | 1.217 | C3O4C5             | 151.4 | C5O4C3O1            | 0.0    |
| C5C6             | 1.482 | O4C5C6             | 124.8 | O4C5C6C3            | 0.0    |
| C6C7             | 1.339 | C5C6C7             | 122.0 | C5C6C7O4            | -0.0   |
| C7H8             | 1.084 | C6C7H8             | 120.6 | H8C7C6C5            | 0.0    |
| C7H9             | 1.082 | C6C7H9             | 121.3 | H9C7C6C5            | -180.0 |
| C6H10            | 1.085 | C5C6H10            | 116.7 | H10C6C5O4           | 180.0  |
| C5H11            | 1.106 | C6C5H11            | 115.3 | H11C5C6C7           | 180.0  |

**Table S2e** The B2PLYP-D3(BJ)/6-311++G(d,p) calculated geometries for CO<sub>2</sub>.

| Bond lengths (Å)   |       | Valence angles (°) |      | Dihedral angles (°) |       |
|--------------------|-------|--------------------|------|---------------------|-------|
| C1O2               | 1.165 |                    |      |                     |       |
| C1XX3 <sup>a</sup> | 1.000 | O2O1XX3            | 90.0 |                     |       |
| C1O4               | 1.165 | O4C1XX3            | 90.0 | O4O1XX3O2           | 180.0 |

<sup>a</sup> XX is a dummy atom.



## 6. NBO analysis for ACR-CO<sub>2</sub> (all values in kJ mol<sup>-1</sup>).

Table S3a NBO energies (> 0.21 kJ mol<sup>-1</sup>) of the T1 complex.

| Donor NBO                   | Acceptor NBO          | E (kJ mol <sup>-1</sup> ) | Complexes |
|-----------------------------|-----------------------|---------------------------|-----------|
| From ACR to CO <sub>2</sub> |                       |                           |           |
| $\sigma(1)$ C1 - C3         | RY*(5) C9             | 0.33                      |           |
| $\pi(1)$ C3 - O8            | RY*(1) C9             | 0.50                      |           |
| $\pi(1)$ C3 - O8            | RY*(5) C9             | 0.25                      |           |
| LP (1) O8                   | RY*(5) C9             | 0.54                      |           |
| LP (1) O8                   | $\pi^*(3)$ C9 - O10   | <b>1.97</b>               |           |
| LP (2) O8                   | RY*(6) C9             | 0.33                      |           |
| LP (2) O8                   | $\pi^*(3)$ C9 - O10   | <b>5.31</b>               |           |
| From CO <sub>2</sub> to ACR |                       |                           |           |
| LP (1) O11                  | RY*(4) H4             | 0.46                      |           |
| LP (1) O11                  | $\sigma^*(1)$ C3 - H4 | <b>0.29</b>               |           |
| LP (2) O11                  | $\sigma^*(1)$ C3 - H4 | <b>0.25</b>               |           |

Table S3b NBO energies (> 0.21 kJ mol<sup>-1</sup>) of the T2 complex.

| Donor NBO                   | Acceptor NBO          | E (kJ mol <sup>-1</sup> ) | Complexes |
|-----------------------------|-----------------------|---------------------------|-----------|
| From ACR to CO <sub>2</sub> |                       |                           |           |
| $\pi(1)$ C3 - O8            | RY*(1) C9             | 0.29                      |           |
| $\pi(1)$ C3 - O8            | RY*(6) C9             | 0.46                      |           |
| LP (1) O8                   | RY*(5) C9             | 0.33                      |           |
| LP (1) O8                   | $\pi^*(3)$ C9 - O10   | <b>2.17</b>               |           |
| LP (2) O8                   | $\pi^*(3)$ C9 - O10   | <b>3.18</b>               |           |
| From CO <sub>2</sub> to ACR |                       |                           |           |
| LP (1) O11                  | RY*(1) H2             | 0.92                      |           |
| LP (1) O11                  | $\sigma^*(1)$ C1 - H2 | <b>1.05</b>               |           |
| LP (2) O11                  | RY*(1) H2             | 0.42                      |           |
| LP (2) O11                  | $\sigma^*(1)$ C1 - H2 | <b>0.96</b>               |           |

Table S3c NBO energies (> 0.21 kJ mol<sup>-1</sup>) of the T3 complex.

| Donor NBO                   | Acceptor NBO          | E (kJ mol <sup>-1</sup> ) | Complexes |
|-----------------------------|-----------------------|---------------------------|-----------|
| From ACR to CO <sub>2</sub> |                       |                           |           |
| -                           | -                     | -                         |           |
| From CO <sub>2</sub> to ACR |                       |                           |           |
| $\pi(1)$ C9 - O11           | RY*(2) H4             | 0.29                      |           |
| $\pi(1)$ C9 - O11           | RY*(1) H7             | 1.80                      |           |
| LP (1) O11                  | RY*(3) H4             | 0.29                      |           |
| LP (1) O11                  | RY*(1) H7             | 0.59                      |           |
| LP (1) O11                  | $\sigma^*(1)$ C3 - H4 | 0.88                      |           |
| LP (1) O11                  | $\sigma^*(1)$ C5 - H7 | 1.05                      |           |
| LP (2) O11                  | $\sigma^*(1)$ C3 - H4 | 0.59                      |           |

Table S3d NBO energies (> 0.21 kJ mol<sup>-1</sup>) of the T2 complex.

| Donor NBO                   | Acceptor NBO  | E (kJ mol <sup>-1</sup> ) | Complexes                                                                          |
|-----------------------------|---------------|---------------------------|------------------------------------------------------------------------------------|
| From ACR to CO <sub>2</sub> |               |                           | 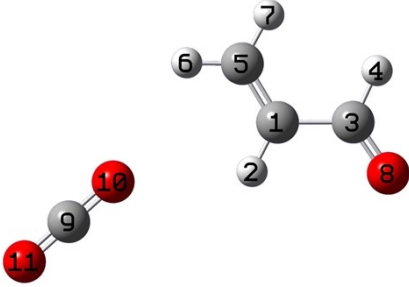 |
| -                           | -             | -                         |                                                                                    |
| From CO <sub>2</sub> to ACR |               |                           |                                                                                    |
| π(1) C9 – O10               | RY*(1) H6     | 0.79                      |                                                                                    |
| LP (1) O10                  | RY*(1) H2     | 0.33                      |                                                                                    |
| LP (1) O10                  | RY*(1) H6     | 0.38                      |                                                                                    |
| LP (1) O10                  | σ*(1) C1 – H2 | 0.29                      |                                                                                    |
| LP (1) O10                  | σ*(1) C5 – H6 | 0.46                      |                                                                                    |
| LP (3) O10                  | σ*(1) C1 – H2 | 0.42                      |                                                                                    |

Table S3e NBO energies (> 0.21 kJ mol<sup>-1</sup>) of the C1 complex.

| Donor NBO                   | Acceptor NBO   | E (kJ mol <sup>-1</sup> ) | Complexes                                                                           |
|-----------------------------|----------------|---------------------------|-------------------------------------------------------------------------------------|
| From ACR to CO <sub>2</sub> |                |                           | 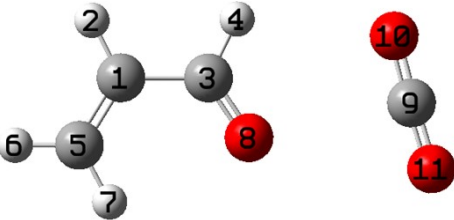 |
| σ(1) C1 – C3                | RY*(5) C9      | 0.29                      |                                                                                     |
| π(1) C3 – O8                | RY*(1) C9      | 0.50                      |                                                                                     |
| π(1) C3 – O8                | RY*(5) C9      | 0.29                      |                                                                                     |
| π(1) C3 – O8                | RY*(3) O11     | 0.25                      |                                                                                     |
| LP (1) O8                   | RY*(5) C9      | 0.63                      |                                                                                     |
| LP (1) O8                   | RY*(3) O11     | 0.25                      |                                                                                     |
| LP (1) O8                   | π*(3) C9 – O11 | <b>2.01</b>               |                                                                                     |
| LP (2) O8                   | RY*(6) C9      | 0.33                      |                                                                                     |
| LP (2) O8                   | π*(3) C9 – O11 | <b>5.56</b>               |                                                                                     |
| From CO <sub>2</sub> to ACR |                |                           |                                                                                     |
| π(1) C9 – O10               | RY*(3) C3      | 0.33                      |                                                                                     |
| LP (1) O10                  | RY*(4) H4      | 0.46                      |                                                                                     |
| LP (1) O10                  | σ*(1) C1 – C3  | 0.25                      |                                                                                     |
| LP (2) O10                  | σ*(1) C3 – H4  | <b>0.25</b>               |                                                                                     |

Table S3f NBO energies (> 0.21 kJ mol<sup>-1</sup>) of the C2 complex.

| Donor NBO                   | Acceptor NBO   | E (kJ mol <sup>-1</sup> ) | Complexes                                                                            |
|-----------------------------|----------------|---------------------------|--------------------------------------------------------------------------------------|
| From ACR to CO <sub>2</sub> |                |                           | 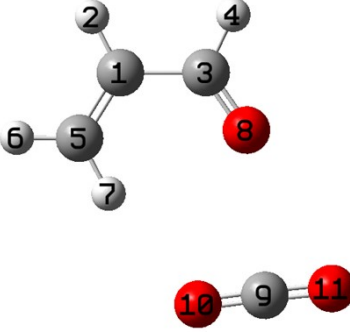 |
| σ(1) C1 – H2                | RY*(5) O10     | 0.33                      |                                                                                      |
| π(1) C3 – O8                | RY*(4) C9      | 0.33                      |                                                                                      |
| π(1) C3 – O8                | RY*(5) C9      | 0.75                      |                                                                                      |
| π(1) C3 – O8                | RY*(3) O11     | 0.25                      |                                                                                      |
| π(2) C3 – O8                | RY*(7) C9      | 0.25                      |                                                                                      |
| σ(1) C5 – H6                | RY*(6) C9      | 0.21                      |                                                                                      |
| σ(1) C5 – H6                | RY*(7) O10     | 0.21                      |                                                                                      |
| LP (1) O8                   | RY*(5) C9      | 0.29                      |                                                                                      |
| LP (1) O8                   | RY*(3) O11     | 0.29                      |                                                                                      |
| LP (1) O8                   | π*(3) C9 – O11 | <b>2.72</b>               |                                                                                      |
| LP (2) O8                   | π*(3) C9 – O11 | <b>1.38</b>               |                                                                                      |
| From CO <sub>2</sub> to ACR |                |                           |                                                                                      |
| π(3) C9 – O11               | π*(1) C3 – O8  | 0.33                      |                                                                                      |
| LP (1) O10                  | RY*(1) H7      | 0.71                      |                                                                                      |
| LP (1) O10                  | RY*(3) H7      | 0.21                      |                                                                                      |

|                   |                       |             |  |
|-------------------|-----------------------|-------------|--|
| LP (1) O10        | RY*(4) H7             | 0.21        |  |
| LP (1) O10        | $\sigma^*(1)$ C5 – H7 | <b>1.46</b> |  |
| LP (2) O10        | RY*(1) H7             | 0.67        |  |
| LP (2) O10        | $\sigma^*(1)$ C5 – H7 | <b>2.51</b> |  |
| LP (1) O11        | RY*(1) H7             | 0.33        |  |
| $\pi(2)$ C9 – O11 | $\pi^*(2)$ C3 – O8    | 0.25        |  |
| $\pi(3)$ C9 – O11 | RY*(1) H7             | 0.21        |  |

## 7. Result of NAOs analysis

Table S4a NAO analysis for T1 about TB binding orbital.

| Index | Occupancies | Bond orbital         | Natural population                           | Complexes                                                                           |
|-------|-------------|----------------------|----------------------------------------------|-------------------------------------------------------------------------------------|
| 21    | 1.98        | LP (1) O8            | s 59.07%, p 40.77%                           | 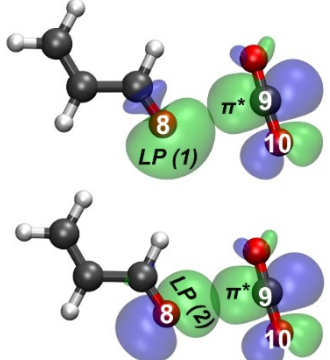 |
| 22    | 1.91        | LP (2) O8            | s 0.03%, p 99.74%                            |                                                                                     |
| 413   | 0.31        | $\pi^*$ (3) C9 = O10 | C: s 0.39%, p 79.80% O:<br>s 0.10%, p 19.33% |                                                                                     |

Table S4b NAO analysis for T2 about TB binding orbital.

| Index | Occupancies | Bond orbital         | Natural population                           | Complexes                                                                           |
|-------|-------------|----------------------|----------------------------------------------|-------------------------------------------------------------------------------------|
| 21    | 1.98        | LP (1) O8            | s 58.96%, p 40.89%                           | 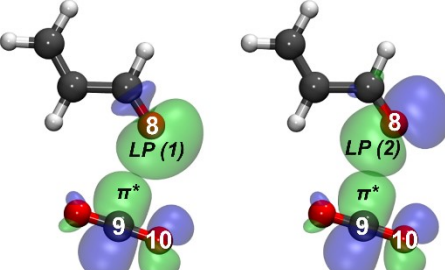 |
| 22    | 1.90        | LP (2) O8            | s 0%, p 99.76%                               |                                                                                     |
| 413   | 0.30        | $\pi^*$ (3) C9 = O10 | C: s 0.51%, p 79.67% O:<br>s 0.08%, p 19.36% |                                                                                     |

Table S4c NAO analysis for C1 about TB binding orbital.

| Index | Occupancies | Bond orbital         | Natural population                           | Complexes                                                                            |
|-------|-------------|----------------------|----------------------------------------------|--------------------------------------------------------------------------------------|
| 21    | 1.98        | LP (1) O8            | s 59.06%, p 40.79%                           | 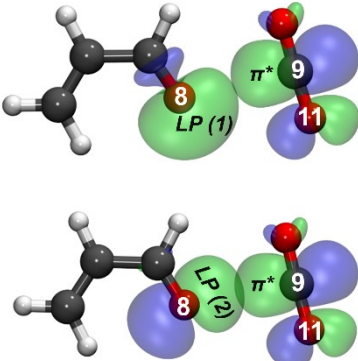 |
| 22    | 1.91        | LP (2) O8            | s 0.08%, p 99.69%                            |                                                                                      |
| 414   | 0.31        | $\pi^*$ (3) C9 = O11 | C: s 0.36%, p 79.87% O:<br>s 0.10%, p 19.30% |                                                                                      |

Table S4d NAO analysis for C2 about TB binding orbital.

| Index | Occupancies | Bond orbital         | Natural population                           | Complexes                                                                            |
|-------|-------------|----------------------|----------------------------------------------|--------------------------------------------------------------------------------------|
| 21    | 1.98        | LP (1) O8            | s 58.81%, p 41.06%                           | 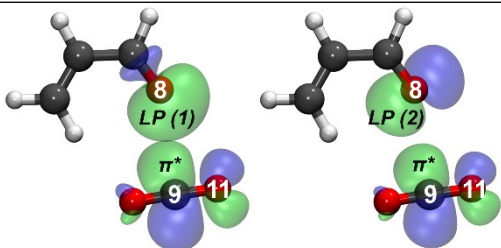 |
| 22    | 1.91        | LP (2) O8            | s 0.02%, p 99.73%                            |                                                                                      |
| 414   | 0.31        | $\pi^*$ (3) C9 = O11 | C: s 0.43%, p 79.78% O:<br>s 0.06%, p 19.35% |                                                                                      |

## 8. NBO analysis for ACR-CO<sub>2</sub> about TB binding orbitals

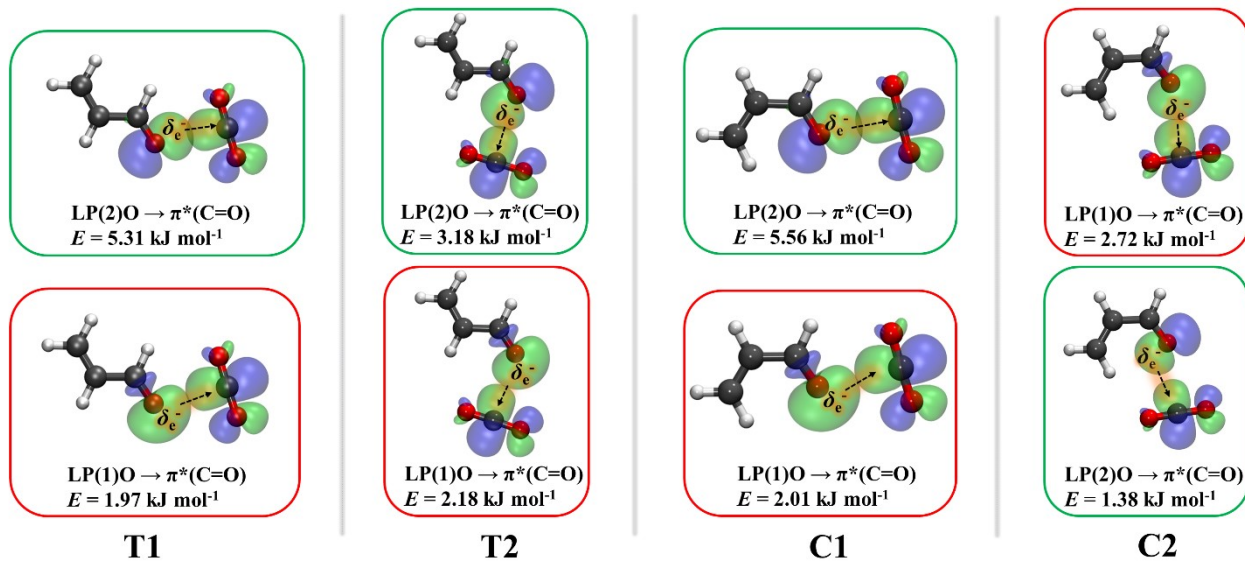

Fig. S4 The  $n \rightarrow \pi^*$  interactions of four ACR-CO<sub>2</sub> clusters by NBO analyses. Green frames:  $n_p \rightarrow \pi^*$ ; red frames:  $n_s \rightarrow \pi^*$  (see Table S4).

## 9. Measured Transition Frequencies

**Table S5**  $\mu_a/\mu_b$ -type transition frequencies ( $\nu$ /MHz) and corresponding observed – calculated deviations ( $\Delta\nu$ /kHz) for **T1**.

| Transitions    |                              | $\nu$ /MHz | $\Delta\nu$ /kHz |
|----------------|------------------------------|------------|------------------|
| $J' K_a' K_c'$ | $\leftarrow J'' K_a'' K_c''$ |            |                  |
| 3 0 3          | 2 0 2                        | 5413.9034  | 0.2              |
| 3 1 3          | 2 1 2                        | 5267.9892  | 0                |
| 3 1 2          | 2 1 1                        | 5566.8336  | 0.2              |
| 3 2 2          | 2 2 1                        | 5418.1045  | 1.7              |
| 3 2 1          | 2 2 0                        | 5422.2425  | 0                |
| 4 0 4          | 3 0 3                        | 7213.6541  | 0.4              |
| 4 1 4          | 3 1 3                        | 7022.7427  | 0.4              |
| 4 1 3          | 3 1 2                        | 7421.1545  | 0.1              |
| 4 2 3          | 3 2 2                        | 7223.2729  | -0.4             |
| 4 2 2          | 3 2 1                        | 7233.6171  | 0                |
| 5 0 5          | 4 0 4                        | 9009.2352  | 0.1              |
| 5 1 5          | 4 1 4                        | 8776.4501  | 0.1              |
| 5 1 4          | 4 1 3                        | 9274.3500  | 0.3              |
| 5 2 4          | 4 2 3                        | 9027.7044  | 0.3              |
| 5 2 3          | 4 2 2                        | 9048.3693  | -0.1             |
| 5 3 3          | 4 3 2                        | 9033.6100  | -2.8             |
| 5 3 2          | 4 3 1                        | 9033.7499  | -4               |
| 6 0 6          | 5 0 5                        | 10799.6403 | -2.2             |
| 6 1 6          | 5 1 5                        | 10528.8765 | 0.6              |
| 6 1 5          | 5 1 4                        | 11126.1132 | 0.6              |
| 6 2 5          | 5 2 4                        | 10831.2108 | 0.5              |
| 6 2 4          | 5 2 3                        | 10867.3068 | 0.3              |
| 7 0 7          | 6 0 6                        | 12583.9202 | 0.2              |
| 7 1 7          | 6 1 6                        | 12279.8010 | 0.7              |
| 7 1 6          | 6 1 5                        | 12976.1195 | 0                |
| 7 2 6          | 6 2 5                        | 12633.6088 | 1                |
| 7 2 5          | 6 2 4                        | 12691.1857 | -0.3             |
| 8 0 8          | 7 0 7                        | 14361.1925 | 0.9              |
| 8 1 8          | 7 1 7                        | 14029.0234 | 1.1              |
| 8 1 7          | 7 1 6                        | 14824.0262 | -0.2             |
| 8 2 7          | 7 2 6                        | 14434.7149 | 1.5              |
| 8 2 6          | 7 2 5                        | 14520.6861 | 0.7              |
| 8 3 6          | 7 3 5                        | 14459.1282 | 1.7              |
| 8 3 5          | 7 3 4                        | 14460.8142 | -2               |

|         |       |            |      |
|---------|-------|------------|------|
| 9 0 9   | 8 0 8 | 16130.7009 | -1.1 |
| 9 1 9   | 8 1 8 | 15776.3643 | 1.3  |
| 9 1 8   | 8 1 7 | 16669.4632 | -1.9 |
| 9 2 8   | 8 2 7 | 16234.3458 | 1.1  |
| 9 2 7   | 8 2 6 | 16356.3624 | 2.6  |
| 10 0 10 | 9 0 9 | 17891.8612 | -1.9 |
| 10 1 10 | 9 1 9 | 17521.6665 | -0.6 |
| 1 1 0   | 1 0 1 | 7238.4227  | -1.1 |
| 1 1 1   | 0 0 0 | 8944.8338  | 0    |
| 2 1 1   | 2 0 2 | 7339.0880  | -0.6 |
| 2 1 2   | 1 0 1 | 10651.2430 | 0.2  |
| 3 1 2   | 3 0 3 | 7492.0186  | -0.2 |
| 3 1 3   | 2 0 2 | 12308.2173 | 0.1  |
| 4 1 3   | 4 0 4 | 7699.5198  | 0.2  |
| 4 1 4   | 3 0 3 | 13917.0560 | -0.2 |
| 5 1 4   | 5 0 5 | 7964.6341  | -0.1 |
| 5 1 5   | 4 0 4 | 15479.8528 | 0.2  |
| 6 1 5   | 6 0 6 | 8291.1047  | 0.5  |
| 6 1 6   | 5 0 5 | 16999.4927 | -0.6 |
| 7 1 6   | 7 0 7 | 8683.3027  | -1   |
| 8 1 7   | 8 0 8 | 9146.1400  | 1.3  |
| 8 0 8   | 7 1 7 | 8465.4591  | -1.4 |

**Table S6.**  $\mu_a/\mu_b$ -type transition frequencies ( $\nu$ /MHz) and corresponding observed – calculated deviations ( $\Delta\nu$ /kHz) for **T2**.

| Transitions    |                              | $\nu$ /MHz | $\Delta\nu$ /kHz |
|----------------|------------------------------|------------|------------------|
| $J' K_a' K_c'$ | $\leftarrow J'' K_a'' K_c''$ |            |                  |
| 2 0 2          | 1 0 1                        | 4211.7185  | 0                |
| 2 1 2          | 1 1 1                        | 4026.9515  | 0.4              |
| 2 1 1          | 1 1 0                        | 4408.2080  | -0.1             |
| 3 0 3          | 2 0 2                        | 6302.9449  | 0                |
| 3 1 3          | 2 1 2                        | 6036.7803  | -0.2             |
| 3 1 2          | 2 1 1                        | 6608.5305  | 0.6              |
| 3 2 2          | 2 2 1                        | 6326.3865  | 0.1              |
| 3 2 1          | 2 2 0                        | 6349.7242  | 0.7              |
| 4 0 4          | 3 0 3                        | 8376.8283  | -0.2             |
| 4 1 4          | 3 1 3                        | 8042.3905  | -0.4             |
| 4 1 3          | 3 1 2                        | 8804.1567  | 0.8              |
| 4 2 3          | 3 2 2                        | 8430.5247  | -0.2             |
| 4 2 2          | 3 2 1                        | 8488.6225  | -0.2             |
| 4 3 2          | 3 3 1                        | 8446.5942  | -0.8             |
| 4 3 1          | 3 3 0                        | 8447.2676  | 1                |
| 5 0 5          | 4 0 4                        | 10428.2612 | -0.6             |
| 5 1 5          | 4 1 4                        | 10042.6308 | 0                |
| 5 1 4          | 4 1 3                        | 10993.2573 | 0.7              |
| 5 2 4          | 4 2 3                        | 10530.6780 | 0.3              |
| 5 2 3          | 4 2 2                        | 10645.8777 | 0.2              |
| 5 3 3          | 4 3 2                        | 10562.7965 | -1.2             |
| 5 3 2          | 4 3 1                        | 10565.1426 | -1.9             |
| 6 0 6          | 5 0 5                        | 12453.2642 | -1.2             |
| 6 1 6          | 5 1 5                        | 12036.5578 | 2                |
| 6 1 5          | 5 1 4                        | 13173.7739 | 0.6              |
| 6 2 5          | 5 2 4                        | 12625.8614 | 1                |
| 6 2 4          | 5 2 3                        | 12824.4341 | 2.1              |
| 6 3 4          | 5 3 3                        | 12681.4453 | -3               |
| 6 3 3          | 5 3 2                        | 12687.6886 | -2               |
| 7 0 7          | 6 0 6                        | 14449.7286 | -0.2             |
| 7 1 7          | 6 1 6                        | 14023.4631 | 0.2              |
| 7 1 6          | 6 1 5                        | 15343.3634 | 0.3              |
| 7 2 6          | 6 2 5                        | 14715.1077 | 2.4              |
| 7 2 5          | 6 2 4                        | 15025.3441 | 1.7              |
| 7 3 5          | 6 3 4                        | 14802.4782 | 0.1              |



|       |       |            |      |
|-------|-------|------------|------|
| 7 3 4 | 6 3 3 | 14816.4654 | -0.3 |
| 8 0 8 | 7 0 7 | 16418.0371 | -0.7 |
| 8 1 8 | 7 1 7 | 16002.9158 | 3.1  |
| 1 1 0 | 1 0 1 | 4757.3041  | -3.1 |
| 1 1 1 | 0 0 0 | 6675.4677  | 0.5  |
| 2 1 1 | 2 0 2 | 4953.7958  | -1.1 |
| 2 1 2 | 1 0 1 | 8593.6245  | -0.3 |
| 3 1 2 | 3 0 3 | 5259.3802  | -1.7 |
| 3 1 3 | 2 0 2 | 10418.6870 | 0    |
| 4 1 3 | 4 0 4 | 5686.7085  | -0.8 |
| 4 1 4 | 3 0 3 | 12158.1318 | -1.3 |
| 5 1 4 | 5 0 5 | 6251.7034  | -0.6 |
| 5 0 5 | 4 1 4 | 6646.9580  | 0.7  |
| 5 1 5 | 4 0 4 | 13823.9368 | 1.3  |
| 6 1 5 | 6 0 6 | 6972.2145  | 2.6  |
| 6 0 6 | 5 1 5 | 9057.5919  | 0    |
| 6 1 6 | 5 0 5 | 15432.2281 | -1.2 |
| 7 1 6 | 7 0 7 | 7865.8468  | 0.7  |
| 7 0 7 | 6 1 6 | 11470.7633 | -1.6 |
| 7 1 7 | 6 0 6 | 17002.4281 | 1.3  |
| 8 0 8 | 7 1 7 | 13865.3358 | -4.2 |

**Table S7.**  $\mu_a/\mu_b$ -type transition frequencies ( $\nu$ /MHz) and corresponding observed – calculated deviations ( $\Delta\nu$ /kHz) for the **C1**.

| Transitions    |                              | $\nu$ /MHz | $\Delta\nu$ /kHz |
|----------------|------------------------------|------------|------------------|
| $J' K_a' K_c'$ | $\leftarrow J'' K_a'' K_c''$ |            |                  |
| 3 0 3          | 2 0 2                        | 5595.7700  | -0.1             |
| 3 1 3          | 2 1 2                        | 5439.4111  | 0.5              |
| 3 1 2          | 2 1 1                        | 5760.2868  | 0                |
| 4 0 4          | 3 0 3                        | 7455.3266  | 0                |
| 4 1 4          | 3 1 3                        | 7251.1029  | -1               |
| 4 1 3          | 3 1 2                        | 7678.8852  | 0                |
| 5 0 5          | 4 0 4                        | 9310.0215  | 1.1              |
| 5 1 5          | 4 1 4                        | 9061.5854  | -0.3             |
| 5 1 4          | 4 1 3                        | 9596.1741  | -0.6             |
| 6 0 6          | 5 0 5                        | 11158.6884 | 1.4              |
| 6 1 6          | 5 1 5                        | 10870.5849 | 0                |
| 6 1 5          | 5 1 4                        | 11511.7946 | -1.2             |
| 7 0 7          | 6 0 6                        | 13000.2281 | -0.4             |
| 7 1 7          | 6 1 6                        | 12677.8510 | 0                |
| 7 1 6          | 6 1 5                        | 13425.3675 | 0.2              |
| 8 0 8          | 7 0 7                        | 14833.6573 | 0                |
| 8 1 8          | 7 1 7                        | 14483.1580 | 0.1              |
| 8 1 7          | 7 1 6                        | 15336.4812 | -0.1             |
| 1 1 0          | 1 0 1                        | 7138.8178  | -0.6             |
| 1 1 1          | 0 0 0                        | 8898.7392  | -1.2             |
| 2 1 1          | 2 0 2                        | 7246.9876  | -0.9             |
| 2 1 2          | 1 0 1                        | 10658.6485 | 1.9              |
| 3 1 2          | 3 0 3                        | 7411.5056  | 0.4              |
| 3 1 3          | 2 0 2                        | 12365.5056 | 0                |
| 4 1 3          | 4 0 4                        | 7635.0648  | 0.9              |
| 4 1 4          | 3 0 3                        | 14020.8389 | -0.5             |
| 5 1 4          | 5 0 5                        | 7921.2188  | 0.5              |
| 5 1 5          | 4 0 4                        | 15627.0986 | 0                |
| 6 1 5          | 6 0 6                        | 8274.3248  | -2.3             |
| 6 1 6          | 5 0 5                        | 17187.6632 | 0.1              |
| 7 1 6          | 7 0 7                        | 8699.4674  | 1.5              |
